# Supplementary material for: Solid-state synthesis of diminutively granular and highly crystalline manganese hexacyanoferrate for a supercapacitor electrode
Source: Royal Society of Chemistry journal article supplement (doi:10.1039/d3ce01299a), 2024-01-01
Supplement: d3ce01299a1.pdf [file d3ce01299a1.pdf]

## Supporting Information

### Solid-State Synthesis of Diminutively Granular and Highly Crystalline Manganese Hexacyanoferrate for Supercapacitor Electrode

Hui Ju<sup>a</sup>, Hongli Lang<sup>a</sup>, Tengfei Yi<sup>a</sup>, Ke Tian<sup>a</sup>, Jianru Yue<sup>a</sup>, Lin Hu<sup>a</sup>, Ling Zhao<sup>a</sup>, Shuxin Liu<sup>a, \*</sup>,  
Dejian Kong<sup>b, \*</sup>

<sup>a</sup>College of Chemistry and Chemical Engineering, Mianyang Teachers' College, Mianyang,  
621900, China.

<sup>b</sup>Institute of Materials, China Academy of Engineering Physics, Jianguo, 621907, China.

**\*Corresponding author:** E-mail address: liushuxin88@126.com

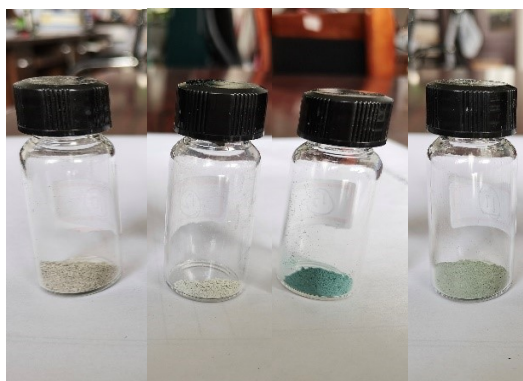

Fig. S1 Photographs of MnHCF-C, MnHCF-H, MnHCF-E and MnHCF

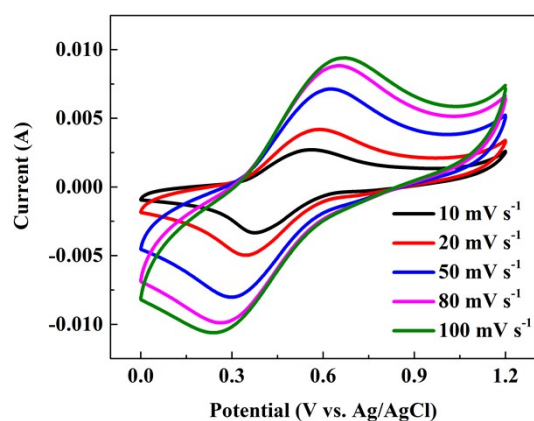

Fig. S2 CV curves of MnHCF-C electrode at different scanning rates from 10 to 100  $\text{mV s}^{-1}$

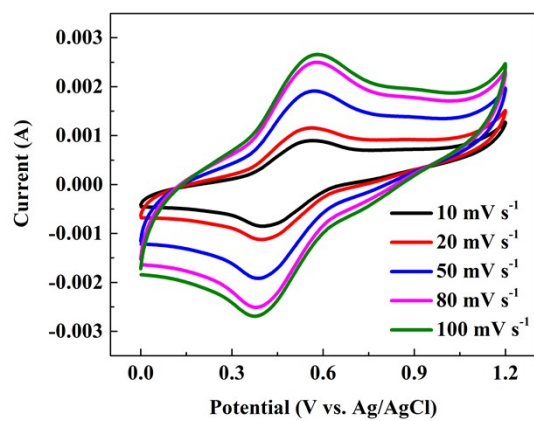

Fig. S3 CV curves of MnHCF-H electrode at different scanning rates from 10 to 100  $\text{mV s}^{-1}$

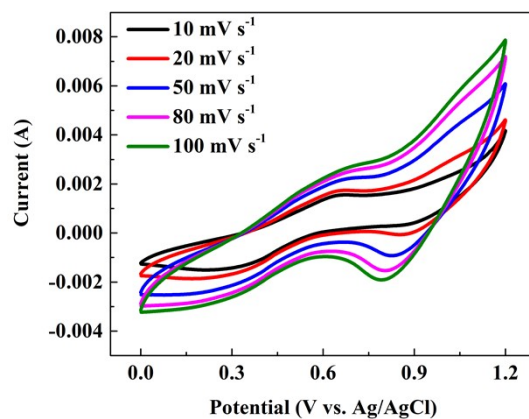

Fig. S4 CV curves of MnHCF-E electrode at different scanning rates from 10 to 100 mV s<sup>-1</sup>

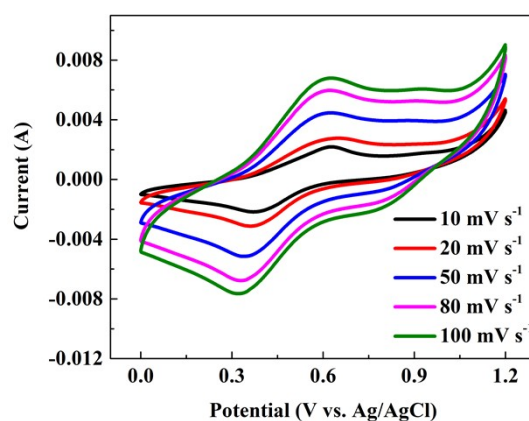

Fig. S5 CV curves of MnHCF electrode at different scanning rates from 10 to 100 mV s<sup>-1</sup>

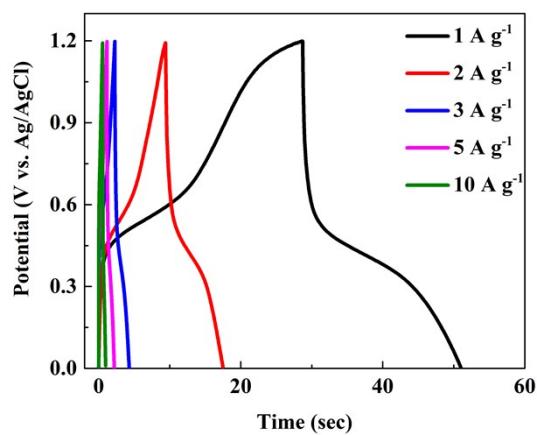

Fig. S6 GCD curves of MnHCF-C electrodes from 1 A g<sup>-1</sup> to 10 A g<sup>-1</sup>

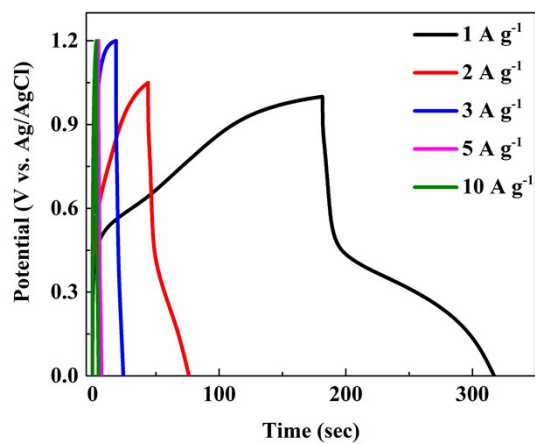

Fig. S7 GCD curves of the MnHCF-H electrode from 1 A g<sup>-1</sup> to 10 A g<sup>-1</sup>

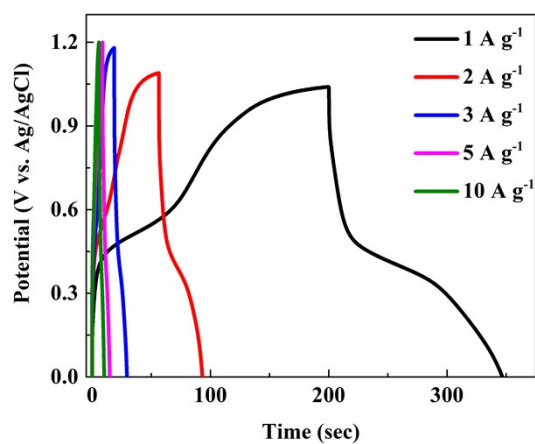

Fig. S8 GCD curves of the MnHCF-E electrode from 1 A g<sup>-1</sup> to 10 A g<sup>-1</sup>

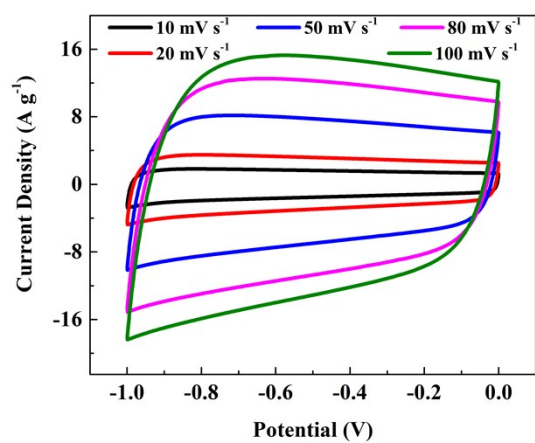

Fig. S9 CV curves of YP-50F electrodes at different scanning rates

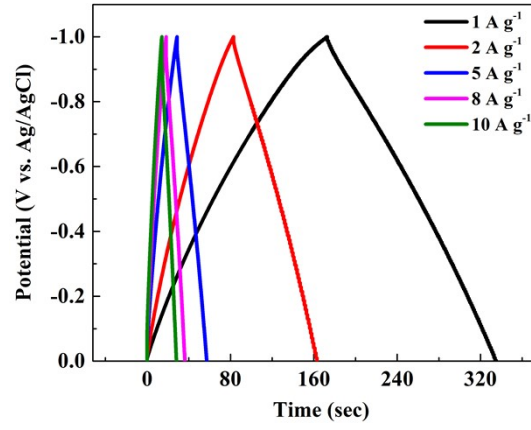

Fig. S10 GCD curves of YP-50F electrodes at different current densities

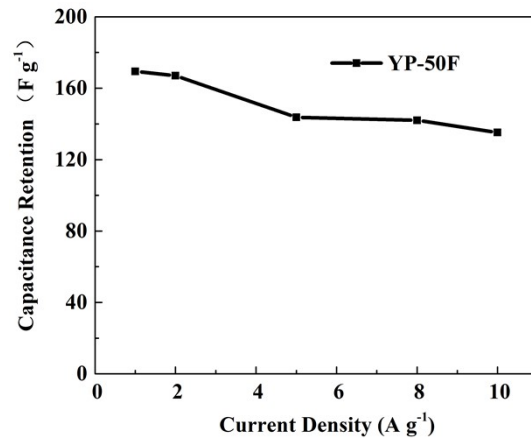

Fig. S11 Specific capacitance of YP-50F
